# Supplementary material
Source: Elsevier journal article supplement (https://www.sciencedirect.com/science/article/pii/S0009739X19300077)
Supplement: mmc1 [file S0009739X19300077:mmc1.docx]

ANEXO I

Definición de las causas de suspensión:

CAUSAS MÉDICAS:

- Falta consulta preanestésica/pruebas complementias: Ausencia de consulta preanestésica o de pruebas preoperatorias necesarias para la intervención quirúrgica.
- Ha cambiado el diagnóstico: El diagnóstico no coincide con el que tenía en un inicio cuando se programó para la cirugía y en la actualidad ha cambiado por lo que habrá que replantear la indicación quirúrgica.
- Necesita consulta a otro servicio: Precisa valoración por otro especialista ya bien sea por un hallazgo nuevo en su situación clínica o por algo no estudiado previamente que tenga implicaciones para realizar la anestesia o la cirugía.
- Necesita nuevas pruebas: Precisa la realización de nuevos estudios ya bien sea por un hallazgo nuevo en su situación clínica o por algo no estudiado previamente que tenga implicaciones para realizar la anestesia o la cirugía.
- Mala planificación prequirúrgica: Situación que se da cuando el cirujano programa a un paciente que no cumple los criterios clínicos o analíticos adecuados para poder realizar la intervención, dentro de este grupo se incluirían las causas por falta de previsión o desconocimiento.
- No tiene reserva de hemoderivados: No dispone de hemoderivados reservados para una cirugía que tiene riesgo de sangrado.
- Evolución favorable: El diagnóstico no coincide con el que tenía en un inicio cuando se programó para la cirugía y en la actualidad ha mejorado hasta el punto de no precisar intervención.
- Empeoramiento de su enfermedad basal: Paciente con comorbilidades asociadas que tras valoración en preanestesia ha empeorado clínicamente presentando alguna alteración que contraindica la realización de la anestesia y/o la cirugía.
- Infección sistémica o local/fiebre: Enfermedad infecciosa local o sistémica que cursa o no con hipertermia de nueva aparición. Se incluye a los pacientes que no acuden pero que llaman para avisar de la situación.
- Mala planificación de la medicación preoperatoria: No se han establecido de forma correcta las pautas de sustitución o suspensión de la medicación habitual del paciente previo a la intervención.
- Mala planificación de la consulta preanestésica: El paciente no se puede intervenir por alguna circunstancia que se debería haber previsto desde la consulta preanestésica.
- Alteración de la coagulación: Paciente al que se le solicita una nueva coagulación desde la consulta preanestésica a colación de su medicación domiciliaria o enfermedad concomitante para que se realice a su llegada al hospital el día de la cirugía y que esté fuera de rangos analítico normales.
- Proceso intercurrente: Se define como todo aquel acontecimiento médico fisiológico, patológico o accidental que le ocurre al paciente e interfiere con el procedimiento al que va a ser sometido (por ejemplo menstruación en paciente que va a ser sometida a una histeroscopia, embarazo, lesiones tras accidente de tráfico…).

CAUSAS ADMINISTRATIVAS:

- No se llamó al paciente: Desde recepción, no se llamó al paciente para avisarle del día de la intervención.
- Falta de tiempo: No se puede realizar la cirugía porque no da tiempo por prolongación de las cirugías previas.
- No hay camas: No se puede realizar la cirugía programada porque no hay disponibilidad suficiente de camas en el hospital, se priorizarán las que quedan para los ingresos urgentes.
- Averías de material: Mal funcionamiento de equipo o material necesario para realizar la intervención.
- Falta de material / prótesis / medicación: No disponibilidad de material, prótesis o medicación necesaria para llevar a cabo la intervención.
- Falta de cama en Unidad de Cuidados Intensivos: No se puede realizar la cirugía programada porque no hay disponibilidad suficiente de camas en la Unidad de Cuidados Intensivos, se priorizarán las que quedan para los ingresos urgentes.
- Mala programación: Referida a la programación realizada desde el servicio de recepción responsable de citar a los pacientes, ésta no se ha realizado de forma correcta o con la documentación incompleta.
- Falta consentimiento informado: El paciente no dispone de consentimiento informado ya bien sea para la cirugía o para la anestesia.
- Falta de personal: No hay personal disponible para la realización de la intervención incluyendo en este grupo médicos, enfermería y auxiliares.
- Urgencia que ocupa el quirófano: Se suspende la intervención a consecuencia de otra intervención de urgencia/emergencia que precisa realizarse en ese mismo quirófano, o bien de la misma especialidad o de otra cuando el quirófano de urgencias está ocupado en ese momento y la urgencia no se puede demorar.

CAUSAS DEL PACIENTE:

- No vino: El paciente no acude y tampoco llama para avisar de la causa.
- No tiene la documentación en regla: Entendiéndose que no dispone de toda la documentación adecuada para poder llevar a cabo la cirugía (autorización del seguro por ejemplo).
- Ya se operó. Ya ha sido intervenido y el centro hospitalario no es conocedor de esta circunstancia.
- Éxitus. El paciente ha fallecido.
- No quiere operarse. El paciente decide no realizar la intervención tras acudir al hospital o avisar telefónicamente el día que estaba citado.
- Por causa social no quiere operarse: El paciente decide no intervenirse por causa social ya bien sea porque no cumple criterios para cirugía de cirugía mayor ambulatoria (falta acompañante, domicilio a larga distancia del centro hospitalario…) o motivos personales.
- Falta de preparación preoperatoria: El paciente no ha cumplido de forma adecuada las indicaciones no farmacológicas preanestésicas y/o prequirúrgicas necesarias para realizar la intervención.
- Incumplimiento de pauta farmacológica: El paciente no ha cumplido de forma adecuada las indicaciones farmacológicas preanestésicas y/o prequirúrgicas necesarias para realizar la intervención.
- No está en ayunas: El paciente incumple las horas establecidas de ayuno preoperatorio que se le han informado, recordado telefónicamente y proporcionado también por escrito en la consulta preanestésica.
